# Supplementary material
Source: PubMed Central journal article supplement (PMC6797060)
Supplement: kxy020_supplementary_data.pdf [file kxy020_supplementary_data.pdf]

# Supplementary material for “PERFect: PERmutation Filtering test for microbiome data”

Ekaterina Smirnova <sup>\*1</sup>, S. Huzurbazar<sup>2</sup> and Farhad Jafari<sup>3</sup>

<sup>1</sup>Department of Mathematical Sciences, University of Montana

<sup>2</sup>Department of Statistics, University of Wyoming

<sup>3</sup>Department of Mathematics and Statistics, University of Wyoming

## S1. Illustration of PERFect permutation algorithm

### Filtering loss

To illustrate the intuition behind the choice of filtering loss  $FL(J)$  and the PERFect permutation approach, we use a small subset of the mock community data 2: bias experiment data with 7 signal taxa. The number of taxa identified by the sequencing and bioinformatics pipeline was 46. From this data set, we have selected a total of  $p = 20$  taxa and  $n = 10$  samples. We have ordered columns by taxa abundance, such that the first 13 rare taxa are noise and the rest are signal. We have labeled taxa according to noise and signal abundance ordering, such that  $N_1$  stands for the least abundant noise taxon,  $N_2$  the second least abundant noise taxon,  $S_1$  the first least abundant signal taxon, and so on. The corresponding counts data matrix is given in Table 1.

Table 1: Toy data with 10 samples and 20 taxa we use to illustrate PERFect permutation algorithm steps.

|           | Noise taxa |       |       |       |       |       |       |       |       |          |          |          |          | Signal taxa |       |       |       |       |       |       |
|-----------|------------|-------|-------|-------|-------|-------|-------|-------|-------|----------|----------|----------|----------|-------------|-------|-------|-------|-------|-------|-------|
|           | $N_1$      | $N_2$ | $N_3$ | $N_4$ | $N_5$ | $N_6$ | $N_7$ | $N_8$ | $N_9$ | $N_{10}$ | $N_{11}$ | $N_{12}$ | $N_{13}$ | $S_1$       | $S_2$ | $S_3$ | $S_4$ | $S_5$ | $S_6$ | $S_7$ |
| Sample 1  | 0          | 0     | 0     | 0     | 6     | 0     | 0     | 0     | 0     | 1        | 0        | 0        | 0        | 2422        | 0     | 2     | 4971  | 5493  | 0     | 1     |
| Sample 2  | 0          | 0     | 0     | 0     | 1     | 0     | 0     | 0     | 0     | 0        | 0        | 0        | 1        | 0           | 1     | 12725 | 663   | 0     | 4926  | 3     |
| Sample 3  | 0          | 0     | 0     | 0     | 0     | 0     | 1     | 0     | 0     | 0        | 0        | 3        | 1        | 3307        | 0     | 0     | 3252  | 2     | 3     | 2     |
| Sample 4  | 0          | 0     | 0     | 0     | 0     | 0     | 0     | 0     | 0     | 0        | 0        | 0        | 2        | 0           | 3199  | 0     | 0     | 0     | 1854  | 6501  |
| Sample 5  | 0          | 9     | 0     | 0     | 0     | 2     | 0     | 0     | 3     | 24       | 3        | 36       | 4        | 1           | 19    | 4     | 51332 | 2     | 1     | 14    |
| Sample 6  | 0          | 0     | 0     | 0     | 0     | 0     | 0     | 0     | 0     | 0        | 1        | 0        | 1        | 0           | 0     | 14212 | 0     | 883   | 7     | 11    |
| Sample 7  | 0          | 0     | 0     | 0     | 0     | 1     | 0     | 0     | 0     | 4        | 3        | 1        | 0        | 1020        | 1     | 1     | 0     | 2     | 0     | 23306 |
| Sample 8  | 1          | 0     | 1     | 1     | 0     | 0     | 0     | 1     | 0     | 0        | 0        | 0        | 0        | 2094        | 45    | 12    | 1     | 4     | 47    | 14188 |
| Sample 9  | 0          | 0     | 0     | 0     | 0     | 0     | 0     | 0     | 1     | 0        | 1        | 1        | 1        | 0           | 16037 | 0     | 1557  | 2217  | 5     | 30    |
| Sample 10 | 0          | 0     | 0     | 0     | 0     | 0     | 2     | 4     | 0     | 0        | 0        | 0        | 0        | 14          | 17    | 4559  | 3770  | 2     | 25    | 4836  |

An underlying assumption for our filtering loss is that if a noise taxon is not important, then removing it will not dramatically affect the magnitude of taxa covariance matrix (up to a scaling factor)  $X^T X$ . We define the filtering loss statistic (2.2) due to removing a group of taxa,  $J$ , as

$$FL(J) = 1 - \frac{\|X_{-J}^T X_{-J}\|_F^2}{\|X^T X\|_F^2},$$

---

\*Corresponding author: ekaterina.smirnova@mso.umt.edu

where  $X_{-J}$  is the  $n \times (p - |J|)$  dimensional matrix obtained by removing the columns indexed by the set  $J$  from the data matrix  $X$ . To illustrate the ability of this filtering loss to distinguish between noise and signal taxa, we calculate filtering loss values for the toy data in Table 1. In this example, the magnitude of the full OTU table, denominator in the filtering loss function value, is  $8.1258 \times 10^{18}$ . Table 2 compares the magnitudes of reduced OTU tables and corresponding filtering loss values due to removing: 1) the 10th least abundant noise taxon,  $J_1 = \{N_{10}\}$ ; 2) the 1st least abundant signal taxon  $J_2 = \{S_1\}$ ; 3) all noise taxa,  $J_3 = \{N_1, \dots, N_{13}\}$ ; and 4) all noise taxa plus the 1st least abundant signal,  $J_4 = \{N_1, \dots, N_{13}, S_1\}$ .

The filtered OTU table magnitude  $\|X_{-J}^T X_{-J}\|_F^2$  for the 10th least abundant taxon is almost the same as that of the full OTU table  $\|X^T X\|_F^2$  (displayed as the same value due to rounding), thus filtering loss is minimal,  $FL(J) = 3.7876 \times 10^{-07}$  ( $-14.786$  on the log scale). However, the loss due to removing the signal taxon is significantly larger  $FL(J) = 9.3960 \times 10^{-04}$  ( $-6.970$  on the log scale). Log filtering loss due to removing all noise taxa is minimal  $-13.545$ , thus removing an additional signal taxon  $S_1$  increases overall log filtering loss for the set  $J_4$  to  $-6.969$ . These differences reflect that all noise taxa cumulatively have less contribution than a single signal taxon.

Table 2: Filtering loss due to removing noise and signal taxa from the toy data set in Table 1.

|       | $\ X_{-J}^T X_{-J}\ _F^2$ | $\ X^T X\ _F^2$         | $FL(J)$                  | $\log[FL(J)]$ |
|-------|---------------------------|-------------------------|--------------------------|---------------|
| $J_1$ | $8.1258 \times 10^{18}$   | $8.1258 \times 10^{18}$ | $3.7876 \times 10^{-07}$ | $-14.786$     |
| $J_2$ | $8.1181 \times 10^{18}$   | $8.1258 \times 10^{18}$ | $9.3960 \times 10^{-04}$ | $-6.970$      |
| $J_3$ | $8.1257 \times 10^{18}$   | $8.1258 \times 10^{18}$ | $1.3109 \times 10^{-06}$ | $-13.545$     |
| $J_4$ | $8.1181 \times 10^{18}$   | $8.1258 \times 10^{18}$ | $9.4091 \times 10^{-04}$ | $-6.969$      |

## Permutation PERFect algorithm

Input: OTU table 1, test critical value  $\alpha = 0.10$

1. Run simultaneous PERFect algorithm to obtain taxa p-values  $p_j, j = 1, \dots, p$
2. Order columns of  $X$  such that  $p_1 \geq p_2 \geq \dots \geq p_p$ .

In the first row of counts table below, we list taxa simultaneous PERFect p-values. Notice that some taxa that were initially less important according to the abundance ordering, gained higher ranking according to simultaneous PERFect p-values. For example,  $N_2$ , the 2nd least important taxon in the abundance ordering, is now the 7th least important taxon in the simultaneous PERFect p-values ordering.

|                               | Noise taxa |       |       |       |       |       |       |       |       |          |          |          |          | Signal taxa |       |       |       |       |       |       |
|-------------------------------|------------|-------|-------|-------|-------|-------|-------|-------|-------|----------|----------|----------|----------|-------------|-------|-------|-------|-------|-------|-------|
|                               | $N_1$      | $N_3$ | $N_4$ | $N_5$ | $N_6$ | $N_7$ | $N_2$ | $N_8$ | $N_9$ | $N_{11}$ | $N_{10}$ | $N_{12}$ | $N_{13}$ | $S_6$       | $S_4$ | $S_5$ | $S_1$ | $S_3$ | $S_2$ | $S_7$ |
| Simultaneous PERFect p-values | NA         | 0.87  | 0.8   | 0.8   | 0.8   | 0.79  | 0.77  | 0.61  | 0.55  | 0.52     | 0.45     | 0.34     | 0.24     | 0.13        | 0.09  | 0.09  | 0.06  | 0.06  | 0.03  | 0.03  |

3. For taxon  $j = 1, \dots, p - 1$

```

Let  $J_j = \{1, \dots, j\}$ 
Calculate  $DFL(j+1) = FL(J+1) - FL(J)$ 
end

```

The test statistic  $DFL$  and its corresponding values on the log scale are displayed below. The values of  $\log(DFL)$  range between  $-23.71$  and  $-13.98$  for the noise taxa and increase dramatically  $\log(DFL) = -6.79$  for the value of the first signal taxon  $S_6$ . The  $\log(DFL)$  values for signal taxa range between  $-7.5$  and  $-0.12$ , which is much larger compared to corresponding statistic values for the noise taxa. In the next step of the algorithm, we construct the distribution for each taxon  $N_1$  through  $N_{13}$  and  $S_1$  through  $S_7$  to evaluate significance of corresponding taxa  $\log(DFL)$  values.

|             | Noise taxa             |                        |                        |                        |                        |                        |                        |                        |                        |                        |                        |                        |                        |
|-------------|------------------------|------------------------|------------------------|------------------------|------------------------|------------------------|------------------------|------------------------|------------------------|------------------------|------------------------|------------------------|------------------------|
|             | $N_1$                  | $N_3$                  | $N_4$                  | $N_5$                  | $N_6$                  | $N_7$                  | $N_2$                  | $N_8$                  | $N_9$                  | $N_{11}$               | $N_{10}$               | $N_{12}$               | $N_{13}$               |
| DFL         | NA                     | $5.06 \times 10^{-11}$ | $5.06 \times 10^{-11}$ | $5.94 \times 10^{-10}$ | $2.73 \times 10^{-09}$ | $7.49 \times 10^{-11}$ | $5.25 \times 10^{-08}$ | $4.16 \times 10^{-10}$ | $6.02 \times 10^{-09}$ | $7.28 \times 10^{-09}$ | $3.79 \times 10^{-07}$ | $8.51 \times 10^{-07}$ | $1.13 \times 10^{-08}$ |
| $\log(DFL)$ | NA                     | -23.71                 | -23.71                 | -21.24                 | -19.72                 | -23.31                 | -16.76                 | -21.6                  | -18.93                 | -18.74                 | -14.79                 | -13.98                 | -18.3                  |
|             | Signal taxa            |                        |                        |                        |                        |                        |                        |                        |                        |                        |                        |                        |                        |
|             | $S_6$                  | $S_4$                  | $S_5$                  | $S_1$                  | $S_3$                  | $S_2$                  | $S_7$                  |                        |                        |                        |                        |                        |                        |
| DFL         | $1.12 \times 10^{-03}$ | $8.90 \times 10^{-01}$ | $5.52 \times 10^{-04}$ | $7.67 \times 10^{-04}$ | $1.83 \times 10^{-02}$ | $8.92 \times 10^{-03}$ | $8.08 \times 10^{-02}$ |                        |                        |                        |                        |                        |                        |
| $\log(DFL)$ | -6.79                  | -0.12                  | -7.5                   | -7.17                  | -4                     | -4.72                  | -2.52                  |                        |                        |                        |                        |                        |                        |

```

4. For taxon  $j = 1, \dots, p - 1$ 
   For permutation  $1, \dots, k$ 
     Randomly select  $J_{j+1}^* \subset \{1, \dots, p\}$  with  $|J_{j+1}^*| = j + 1$ 
     Calculate  $DFL^*(j+1) = FL(J_{j+1}^*) - FL(J^*)$ 
   end
end

```

In this step, to build the distribution for  $j$  taxa filtering loss differences using permutations, we randomly draw  $k$  sets  $J_{j+1}^*$  taxa labels and calculate a sample of corresponding  $DFL^*(j+1)$  values. For example, to obtain  $k = 2$  permutations for 10 taxa, we draw sets of size  $|J_{j+1}^*| = 10$ . The filtering loss differences  $DFL^*(j+1)$  are calculated according to the ordering given by permutation.

In particular, for  $k = 1$  permutation,  $J_{j+1}^* = \{N_6, N_{10}, N_2, S_5, N_7, S_7, N_1, S_3, S_1, N_3\}$  and thus  $DFL^*(j+1)$  is calculated as

$$DFL^*(10) = FL^*(\{N_6, N_{10}, N_2, S_5, N_7, S_7, N_1, S_3, S_1, N_3\}) - FL^*(\{N_6, N_{10}, N_2, S_5, N_7, S_7, N_1, S_3, S_1\}).$$

For  $k = 2$  permutation,

$$DFL^*(10) = FL^*(\{N_{12}, N_2, N_9, S_2, S_5, N_7, S_7, N_4, N_{13}, N_1\}) - FL^*(\{N_{12}, N_2, N_9, S_2, S_5, N_7, S_7, N_4, N_{13}\}).$$

```

5. For taxon  $j = 1, \dots, p - 1$ 
   Using quantile matching fit the Skew Normal distribution to the
   logarithm of the sample  $DFL^*(j+1), j = 1, \dots, p - 1$  to obtain
   the null distribution  $X_{j+1} \sim \text{SN}(\hat{\xi}_j, \hat{\omega}_j^2, \hat{\alpha}_j)$ 
end

```

For example, to estimate the parameters of 10 taxa distribution with  $k$  permutations, we would use  $\log(DFL^*(10))$  values  $\{-34.49, -27.55, \dots, k\}$  to fit Skew Normal distribution using quantile matching method. We increase the number of permutations to  $k = 1000$ , which is necessary to

get a reasonable distribution for the values of  $DFL^*(j + 1)$ . Figure 1 illustrates the histogram of  $\log(DFL^*(10))$  sample, where with the blue line indicates Skew Normal fit. Because we have only 20 taxa in this example, the distribution fit is not as accurate as for the larger number of taxa, but nevertheless, it illustrates the idea. The estimated distribution parameters are  $\xi = -18.3, \omega = 7.11, \alpha = -0.03$ .

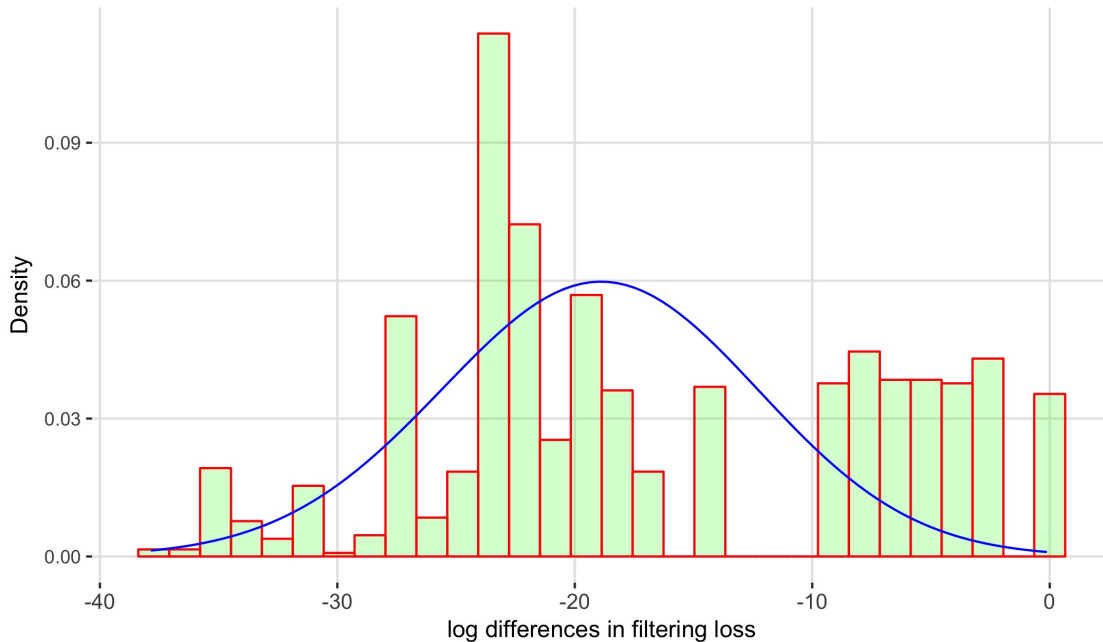

Figure 1: Histogram of log-transformed  $DFL$  values for the Fettweis et al., 2012 data. The blue line indicates  $SN(\xi = -18.3, \omega^2 = 7.11^2, \alpha = -0.03)$  density fitted to the log-transformed data using quantile matching method.

6. For taxon  $j = 1, \dots, p - 1$

    Calculate the p-value  $p_{j+1}$  for  $DFL(j + 1), j = 1, \dots, p - 1$  as

$$p_{j+1} := P[X_{j+1} > \log\{DFL(j + 1)\}]$$

end

The  $\log(DFL) = -18.74$  value for the 10th taxon in simultaneous p-values ordering was calculated in step 3. Therefore, we calculate the 10th taxon p-value as

$$p_{10} = P[X_{10} > 18.74], \quad \text{where } X_{10} \sim SN(\hat{\xi}_{10} = -18.30, \hat{\omega}_{10}^2 = 7.11^2, \hat{\alpha}_{10} = -0.03).$$

6. Average 3 subsequent p-values

The 4 rows of the example OTU table below combines taxa PERFect simultaneous p-values, their corresponding  $\log(DFL)$  values, raw PERFect permutation p-values, and their corresponding averaged values. As expected, the p-values of noise taxa are large and the p-values for the signal taxa are small.

|                      | $N_1$ | $N_3$  | $N_4$  | $N_5$  | $N_6$    | Noise taxa |          |          |        |        |        |        | Signal taxa |       |       |      |       |      |       |       |
|----------------------|-------|--------|--------|--------|----------|------------|----------|----------|--------|--------|--------|--------|-------------|-------|-------|------|-------|------|-------|-------|
|                      | $N_7$ | $N_2$  | $N_8$  | $N_9$  | $N_{11}$ | $N_{10}$   | $N_{12}$ | $N_{13}$ | $S_6$  | $S_4$  | $S_5$  | $S_1$  | $S_3$       | $S_2$ | $S_7$ |      |       |      |       |       |
| Simultaneous PERFect |       |        |        |        |          |            |          |          |        |        |        |        |             |       |       |      |       |      |       |       |
| p-values             | NA    | 0.87   | 0.8    | 0.8    | 0.8      | 0.79       | 0.77     | 0.61     | 0.55   | 0.52   | 0.45   | 0.34   | 0.24        | 0.13  | 0.09  | 0.09 | 0.06  | 0.06 | 0.03  | 0.03  |
| $\log(DFL)$          | NA    | -23.71 | -23.71 | -21.24 | -19.72   | -23.31     | -16.76   | -21.6    | -18.93 | -18.74 | -14.79 | -13.98 | -18.3       | -6.79 | -0.12 | -7.5 | -7.17 | -4   | -4.72 | -2.52 |
| Permutation PERFect  |       |        |        |        |          |            |          |          |        |        |        |        |             |       |       |      |       |      |       |       |
| p-values             | NA    | 0.89   | 0.90   | 0.71   | 0.55     | 0.82       | 0.36     | 0.65     | 0.44   | 0.52   | 0.22   | 0.08   | 0.43        | 0.00  | 0.00  | 0.03 | 0.06  | 0.03 | 0.00  | 0.00  |
| Averaged             |       |        |        |        |          |            |          |          |        |        |        |        |             |       |       |      |       |      |       |       |
| p-values             | NA    | 0.83   | 0.72   | 0.69   | 0.58     | 0.61       | 0.48     | 0.54     | 0.39   | 0.27   | 0.24   | 0.17   | 0.14        | 0.01  | 0.03  | 0.04 | 0.03  | 0.01 | 0.01  | 0.00  |

7. Filter the set of taxa  $J_j$  with the first p-value such that  $p_{j+1} \leq \alpha$

The OTU table above indicates that the first significantly small averaged p-value is  $p_{14} = 0.01 \leq 0.1 =: \alpha$ , which occurs at the first signal taxon  $S_6$ . Thus the filtered set of taxa  $J_{13} = \{N_1, N_3, N_4, N_5, N_6, N_7, N_2, N_8, N_9, N_{11}, N_{10}, N_{12}, N_{13}\}$ . Therefore, we preserve the last 7 columns in the final data set that correspond to the true signal taxa.

## S2. Vaginal microbiome data set analysis

Table 3: Correlation table for the true (signal) taxa in the mock 1 Fettweis et al. [2012] data set.

|                       |                      |                    |                     |                    |                  |
|-----------------------|----------------------|--------------------|---------------------|--------------------|------------------|
|                       | L. crispatus cluster | Staphyl. cluster47 | Fusobact. cluster48 | Gardner. vaginalis | Prevotella bivia |
| Enterococcus faecalis | 0.79                 | 0.79               | -0.58               | 0.27               | 0.40             |
| L. crispatus cluster  |                      | 0.84               | -0.3                | 0.14               | 0.30             |
| Staphyl. cluster47    |                      |                    | -0.29               | -0.07              | 0.16             |
| Fusobact. cluster48   |                      |                    |                     | -0.50              | -0.22            |
| Gardner. vaginalis    |                      |                    |                     |                    | 0.02             |

Table 4: Taxa common to the two traditional filtering rules, simultaneous and permutation PERFect approaches for the Ravel et al. [2011] vaginal data set.

|                                |                    |                   |                   |                   |
|--------------------------------|--------------------|-------------------|-------------------|-------------------|
| L. iners                       | L. crispatus       | L. gasseri        | L. jensenii       | Prevotella        |
| Megasphaera                    | Sneathia           | Streptococcus     | Atopobium         | Lachnospiraceae 8 |
| Dialister                      | Anaerococcus       | Eggerthella       | Ruminococcaceae 3 | Segniliparus      |
| Prevotellaceae 1               | Peptoniphilus      | Ureaplasma        | Finegoldia        | Aerococcus        |
| L. vaginalis                   | Staphylococcus     | Parvimonas        | Lactobacillales 2 | Veillonella       |
| Corynebacterium                | Bacteroides        | Lactobacillales 6 | Gardnerella       | Lactobacillales 8 |
| Prevotellaceae 2               | Peptostreptococcus | Mobiluncus        | Porphyromonas     | Clostridiales 17  |
| Ruminococcaceae Incertae Sedis | Ruminococcaceae 4  | Actinomyces       | Anaeroglobus      | Campylobacter     |
| Gemella                        | Lactobacillales 7  |                   |                   |                   |

### Effect of taxa ordering

Section 2 described an approach that relied on ranking taxa according to the number of occurrences NP (2.3) This is not the only reasonable ranking and we introduce three additional taxa ranking criteria.

1. *Simultaneous PERFect p-values*: Simultaneous PERFect (section 2.2.1) estimates the null distribution for the difference in filtering loss  $DFL(j+1)$  for taxa  $j = 1, \dots, p-1$  and calculates simultaneous PERFect corresponding p-values according to equation (2.5) in the paper where smaller

Table 5: Comparison of traditional, and PERFect filtering results for the Ravel et al. [2011] vaginal microbiome data set. For PERFect filtering we use  $\alpha = 0.10$  significance level to determine taxa to retain in the data set.

|             |                        | # Taxa preserved | % Filtered |
|-------------|------------------------|------------------|------------|
| PERFect     | Simultaneous abundance | 42               | 83.00      |
|             | Permutation abundance  | 71               | 71.26      |
|             | Permutation p-values   | 63               | 74.49      |
| Traditional | Rule 1                 | 135              | 45.34      |
|             | Rule 2                 | 126              | 48.99      |

values of  $p_j$  indicate higher importance of the  $j$ th taxon.

2. *Number of connected taxa:* For the  $j$ th taxon with  $j = 1, \dots, p$ , the number of connected taxa is defined as the number of non-zero  $\mathbf{x}_i^T \mathbf{x}_j$  with  $i \neq j$ ,

$$NC(j) := \sum_{i=1, i \neq j}^p I(\mathbf{x}_i^T \mathbf{x}_j \neq 0),$$

where  $I(\cdot)$  is the indicator function. This metric counts the number of  $j$ th taxon co-occurrences with other taxa.

3. *Weighted number of connected taxa:* We weight  $NC(j)$  by the relative number of samples containing  $j$ th taxon to take into account taxa presence,

$$NC_w(j) := \frac{\tilde{n}_j}{n} \sum_{i=1, i \neq j}^p I(\mathbf{x}_i^T \mathbf{x}_j \neq 0),$$

where  $n$  is the total number of samples and  $\tilde{n}_j$  is the number of samples in which the  $j$ th taxon has non-zero counts.

We analyzed the effect of the  $NP$  (2.3), simultaneous PERFect p-values (2.5),  $NC$ , and  $NC_w$  taxa orderings on the PERFect filtering. The number of preserved taxa for the two mock and the vaginal microbiome data sets are compared in Table 6. Results reveal that ordering does not affect detection of correct taxa in the mock data sets. The proposed *simultaneous PERFect p-values (2.5) ordering* reduces the mock data set 1 to a set of 19 and 6 taxa in the simultaneous and permutation PERFect respectively, which is the smallest set that includes the 6 true taxa among both traditional and PERFect filtering with alternative taxa orderings. We recorded the true taxa importance rank based on the four proposed orderings for the two mock data sets in Table 7, where the true taxa in the mock data set 1 are consistently ranked as the 6 most important taxa, indicating that the proposed orderings provide the correct ranking of taxa importance.

While we do not have the gold standard for the Ravel et al. [2011] data, we can compare the results we obtained with the analysis results provided by the authors in their paper. We are especially interested in making sure that taxa that were found to be relevant and descriptive in the Ravel et al. [2011] paper are ranked as important by PERFect and are not filtered out. This is especially important given that PERFect has proven to be much more aggressive at removing taxa than standard techniques. Ravel et al. [2011] analyzed the composition and structure of vaginal communities and identified core microbiomes by grouping samples into five community state types

(CSTs) according to taxa relative abundance and Spearman correlation profiles using hierarchical clustering techniques; results were presented in Figure 1A and Supplementary Table 5 in Ravel et al. [2011]. CST I, II, III, and V were dominated by Lactobacillus *L.crispatus*, *L.gasseri*, *L.iners* and *L.jensenii* species respectively, while CST IV was characterized as a diversity group (Table 1 in Ravel et al. [2011]). Correspondence of taxa arranged in decreasing *NP* order to simultaneous PERFect p-values, *NC* and *NC<sub>w</sub>* values, and taxa average abundance in CST groups are presented in Figures 3-6 of the supplementary material. Results in Figure 3 reveal that CST I, II, III, and V dominant taxa are ranked as the 2nd, 5th, 1st and 9th significant taxa according to the simultaneous PERFect p-values ordering. Moreover, the other taxa with significant simultaneous PERFect p-values are the most abundant taxa in the diverse CST IV group. For example, Lachnospiraceae 8, Proteobacteria 12, Mycoplasmataceae 1 are ranked as the 32nd, 48th and 34th most significant PERFect taxa and have 4.51%, 2.43% and 1.79% abundance levels in CST IV, respectively. However, these taxa are the 42nd, 55th and 51th ranked *NP* taxa respectively. This important information, which is not revealed by the *NP* ordering used in traditional filtering methods, suggests that lower (and thus more significant) PERFect p-values can be used not only for filtering decision, but also as a taxa importance classification method. Such classification may be useful in studying taxa associated with risk of BV, a disease characterized by imbalance of vaginal bacterial species. Finally, taxa with low connectivity values are among the least abundant taxa, indicating that PERFect does not contradict the results of traditional filtering criteria for rare taxa.

Table 6: Ordering effect comparison for simultaneous and permutation PERFect filtering results using: 1) mock data set 1 (Fettweis et al. [2012]); 2) mock data set 2 (Brooks et al. [2015]); and 3) vaginal microbiome data set (Ravel et al. [2011]). Significance level  $\alpha = 0.10$  was used to determine filtering cut off.

|              |                       | Mock Data Set 1<br>Positive Controls Data |           | Mock Data Set 2<br>Bias Experiment Data |           | Vaginal Microbiome<br>Data Set |           |
|--------------|-----------------------|-------------------------------------------|-----------|-----------------------------------------|-----------|--------------------------------|-----------|
|              |                       | # Taxa Preserved                          | %Filtered | # Taxa Preserved                        | %Filtered | # Taxa Preserved               | %Filtered |
| Simultaneous | <i>NP</i>             | 22                                        | 77.78     | 10                                      | 78.26     | 42                             | 83.00     |
|              | p-values              | 22                                        | 77.78     | 10                                      | 78.26     | 48                             | 80.57     |
|              | <i>NC</i>             | 19                                        | 80.81     | 10                                      | 78.26     | 42                             | 83.00     |
|              | <i>NC<sub>w</sub></i> | 20                                        | 79.80     | 10                                      | 78.26     | 43                             | 82.59     |
| Permutation  | <i>NP</i>             | 17                                        | 82.83     | 8                                       | 82.61     | 71                             | 71.26     |
|              | p-values              | 17                                        | 82.83     | 8                                       | 82.61     | 63                             | 74.49     |
|              | <i>NC</i>             | 17                                        | 82.83     | 8                                       | 82.61     | 76                             | 69.23     |
|              | <i>NC<sub>w</sub></i> | 17                                        | 82.83     | 8                                       | 82.61     | 72                             | 70.85     |

Table 7: True taxa ranking in the four proposed taxa orderings for: 1) mock data set 1 (Fettweis et al. [2012]); and 2) mock data set 2 (Brooks et al. [2015]). Higher rank indicates the taxon's larger importance in given ordering.

| Mock Data Set 1<br>Positive Controls Data |           |          |           |                       | Mock Data Set 2<br>Bias Experiment Data |           |          |           |                       |
|-------------------------------------------|-----------|----------|-----------|-----------------------|-----------------------------------------|-----------|----------|-----------|-----------------------|
|                                           | <i>NP</i> | p-values | <i>NC</i> | <i>NC<sub>w</sub></i> |                                         | <i>NP</i> | p-values | <i>NC</i> | <i>NC<sub>w</sub></i> |
| Prevotella.bivia                          | 1         | 4        | 2         | 1                     | Sneathia.amnii                          | 1         | 1        | 3         | 1                     |
| Gardnerella.vaginalis                     | 2         | 1        | 4         | 2                     | Lactobacillus.iners                     | 2         | 2        | 1         | 2                     |
| Fusobacterium.cluster48                   | 3         | 5        | 5         | 3                     | Streptococcus.agalactiae                | 3         | 3        | 5         | 5                     |
| Staphylococcus.cluster47                  | 4         | 2        | 1         | 4                     | Lactobacillus.crispatus cluster         | 4         | 5        | 2         | 3                     |
| Lactobacillus.crispatus cluster           | 5         | 3        | 3         | 5                     | Atopobium.vaginae                       | 5         | 5        | 4         | 4                     |
| Enterococcus.faecalis                     | 6         | 6        | 6         | 6                     | Prevotella.bivia                        | 6         | 6        | 6         | 6                     |
|                                           |           |          |           |                       | Gardnerella.vaginalis                   | 7         | 7        | 7         | 7                     |

## Choice of test level

The PERFect filtering cut-off depends on the choice of the test  $\alpha$  level, which we set to 0.10 to obtain the results discussed in Sections 4 of the manuscript and S2 of the supplementary materials. In practice, this choice might filter out a taxon with undesirably large filtering loss or other importance measure. We therefore suggest examining the p-values plots to confirm the choice of  $\alpha$ . Figure 2 illustrates the plot of permutation PERFect (Algorithm 2) p-values for the Ravel et al., 2011 data. For each taxon on the  $x$ -axis, we color its p-value on the  $y$ -axis according to the quantiles of individual filtering loss  $FL_u$  (2.1). The dashed horizontal red line indicates the filtering at  $\alpha = 0.10$  level, therefore taxa to the left of the dashed purple vertical line correspond to the filtered set  $J$  and to the right of this line to the set  $\{-J\}$  of taxa retained for further analysis. The plot indicates that taxa retained in this data set at the 0.10 level have the 80% largest percentile of  $FL_u$  values. This plot, which can be colored by alternative taxa importance criteria discussed in Section S2 of the supplementary materials, reflects the effect of the test level on the retained taxa and corresponds to taxa importance information.

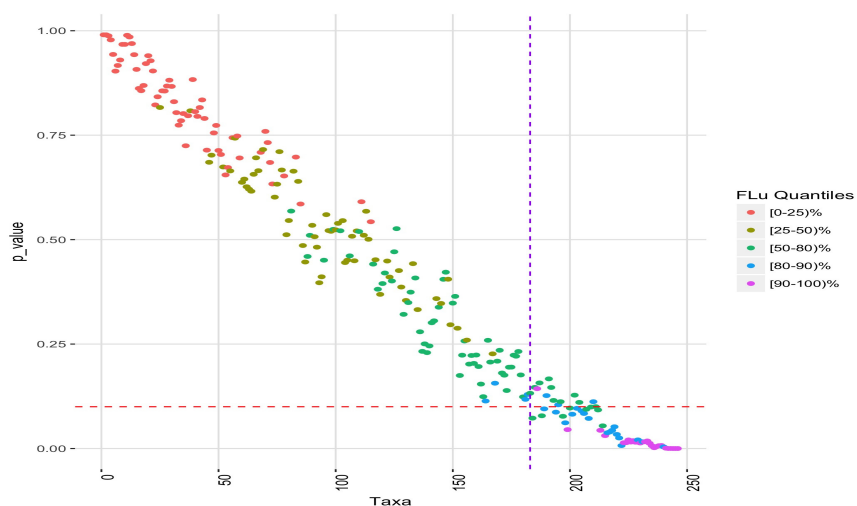

Figure 2: Permutation PERFect p-values for the Ravel et al., 2011 data. Taxa on the  $x$ -axis, arranged in order of simultaneous PERFect p-values (Algorithm 2), are represented by points colored according to the  $FL_u$  (2.1) quantile values. The dashed horizontal red line indicates the  $\alpha = 0.10$  cutoff. Taxa to the left of the dashed purple vertical line correspond to the set of filtered out taxa  $J$  and to the right of this line to the set  $\{-J\}$  of retained taxa.



|                                | NP | pvalues | NC  | NCW | CST.I | CST.II | CST.III | CST.IV | CST.V |
|--------------------------------|----|---------|-----|-----|-------|--------|---------|--------|-------|
| L_iners                        | 1  | 1       | 7   | 1   | 9.06  | 0.71   | 87.99   | 6.15   | 7.54  |
| Prevotella                     | 2  | 3       | 1   | 2   | 0.64  | 2.03   | 1.08    | 19.91  | 0.8   |
| L_crispatus                    | 3  | 2       | 8   | 3   | 83.36 | 0.06   | 1.97    | 1.32   | 0.49  |
| Lactobacillales_5              | 4  | 7       | 18  | 6   | 0.07  | 0.02   | 0.21    | 0.01   | 0.33  |
| Dialister                      | 5  | 10      | 6   | 4   | 0.15  | 0.46   | 0.22    | 4.39   | 0.13  |
| Lactobacillales_2              | 6  | 20      | 25  | 9   | 0.05  | 0      | 0.34    | 0.02   | 0.03  |
| Peptoniphilus                  | 7  | 13      | 3   | 5   | 0.16  | 0.75   | 0.15    | 1.88   | 0.16  |
| Anaerococcus                   | 8  | 15      | 5   | 7   | 0.16  | 1.19   | 0.19    | 2.83   | 0.22  |
| Finegoldia                     | 9  | 14      | 2   | 8   | 0.2   | 0.58   | 0.29    | 1.16   | 0.21  |
| L_jensenii                     | 10 | 9       | 26  | 11  | 2.28  | 0.51   | 2.93    | 0.63   | 80.44 |
| L_gasseri                      | 11 | 5       | 13  | 12  | 1.01  | 85.77  | 0.67    | 0.38   | 4.36  |
| Ureaplasma                     | 12 | 6       | 19  | 14  | 0.13  | 1.09   | 0.18    | 0.91   | 0.33  |
| Corynebacterium                | 13 | 16      | 4   | 10  | 0.1   | 0.23   | 0.15    | 0.77   | 0.16  |
| Atopobium                      | 14 | 19      | 10  | 13  | 0.38  | 0.42   | 0.31    | 7.45   | 0.04  |
| Megasphaera                    | 15 | 11      | 15  | 16  | 0.06  | 0.01   | 1.24    | 9.89   | 0.01  |
| Streptococcus                  | 16 | 4       | 9   | 15  | 0.07  | 1.34   | 0.37    | 5.34   | 2.22  |
| L_vaginalis                    | 17 | 8       | 38  | 18  | 0.36  | 1.58   | 0.12    | 0      | 0.14  |
| Lactobacillales_6              | 18 | 18      | 42  | 20  | 0.3   | 0      | 0.01    | 0.01   | 0     |
| Gardnerella                    | 19 | 27      | 22  | 17  | 0.02  | 0.35   | 0.04    | 0.59   | 0.07  |
| Sneathia                       | 20 | 23      | 35  | 22  | 0.01  | 0.07   | 0.1     | 10.06  | 0.01  |
| Parvimonas                     | 21 | 22      | 23  | 21  | 0.01  | 0.02   | 0.03    | 1.47   | 0.01  |
| Aerococcus                     | 22 | 12      | 33  | 23  | 0.02  | 0.04   | 0.22    | 1.28   | 0.01  |
| Staphylococcus                 | 23 | 21      | 11  | 19  | 0.43  | 0.03   | 0.17    | 0.61   | 0.14  |
| Eggerthella                    | 24 | 17      | 36  | 24  | 0.01  | 0      | 0.08    | 2.23   | 0     |
| Gemella                        | 25 | 25      | 24  | 26  | 0.01  | 0.01   | 0.04    | 0.35   | 0.04  |
| Ruminococcaceae_3              | 26 | 24      | 32  | 28  | 0.01  | 0      | 0.02    | 1.82   | 0     |
| Prevotellaceae_2               | 27 | 28      | 28  | 29  | 0     | 0.01   | 0.01    | 0.66   | 0     |
| Porphyromonas                  | 28 | 26      | 14  | 25  | 0.02  | 0.04   | 0.03    | 0.53   | 0.01  |
| Mobiluncus                     | 29 | 30      | 17  | 27  | 0.04  | 0      | 0.01    | 0.55   | 0.01  |
| Peptostreptococcus             | 30 | 29      | 20  | 30  | 0.01  | 0.1    | 0.03    | 0.7    | 0.01  |
| Ruminococcaceae_4              | 31 | 31      | 31  | 31  | 0.02  | 0.05   | 0.01    | 0.38   | 0.01  |
| Anaeroglobus                   | 32 | 35      | 41  | 34  | 0.01  | 0      | 0.01    | 0.11   | 0     |
| Clostridiales_17               | 33 | 39      | 29  | 33  | 0.07  | 0.17   | 0.05    | 0.31   | 0.04  |
| Lactobacillales_7              | 34 | 50      | 57  | 40  | 0     | 0      | 0.01    | 0.03   | 0.05  |
| Actinomyces                    | 35 | 47      | 12  | 32  | 0     | 0.1    | 0.01    | 0.14   | 0.02  |
| Ruminococcaceae_Incertae_Sedis | 36 | 46      | 46  | 38  | 0     | 0      | 0       | 0.39   | 0     |
| Campylobacter                  | 37 | 41      | 27  | 36  | 0.04  | 0.03   | 0.02    | 0.18   | 0.04  |
| Segniliparus                   | 38 | 45      | 16  | 35  | 0.01  | 0.02   | 0.01    | 0.06   | 0.01  |
| Bacteroides                    | 39 | 44      | 21  | 37  | 0.03  | 0.35   | 0.01    | 0.59   | 0.02  |
| Veillonella                    | 40 | 37      | 39  | 41  | 0.03  | 0.09   | 0.08    | 0.82   | 0.78  |
| Prevotellaceae_1               | 41 | 33      | 48  | 43  | 0     | 0      | 0       | 0.11   | 0     |
| Lachnospiraceae_8              | 42 | 32      | 40  | 42  | 0.01  | 0.01   | 0.09    | 4.51   | 0.01  |
| Exiguobacterium                | 43 | 36      | 52  | 44  | 0.04  | 0.1    | 0.01    | 0.03   | 0.02  |
| Lachnospiraceae_7              | 44 | 40      | 30  | 39  | 0.01  | 0.12   | 0.01    | 0.12   | 0.01  |
| Lactobacillus_2                | 45 | 49      | 103 | 58  | 0.06  | 0.01   | 0.03    | 0      | 0.03  |
| Lactobacillales_1              | 46 | 51      | 60  | 49  | 0     | 0.17   | 0.01    | 0      | 0     |
| Arcanobacterium                | 47 | 56      | 55  | 48  | 0     | 0      | 0       | 0.06   | 0     |
| Moryella                       | 48 | 57      | 53  | 47  | 0     | 0      | 0       | 0.2    | 0     |
| Fusobacterium                  | 49 | 53      | 34  | 45  | 0.04  | 0.02   | 0.01    | 0.17   | 0     |
| Bacteroidetes_8                | 50 | 42      | 58  | 53  | 0     | 0.01   | 0       | 0.16   | 0     |
| Mycoplasmataceae_1             | 51 | 34      | 56  | 51  | 0     | 0.01   | 0.04    | 1.79   | 0     |
| Varibaculum                    | 52 | 38      | 37  | 46  | 0.01  | 0.06   | 0       | 0.08   | 0.02  |
| Coriobacteriaceae_2            | 53 | 54      | 69  | 57  | 0     | 0      | 0       | 0.04   | 0     |
| Lachnospiraceae_Incertae_Sedis | 54 | 59      | 47  | 50  | 0.03  | 0.13   | 0.01    | 0.12   | 0.02  |
| Proteobacteria_12              | 55 | 48      | 64  | 56  | 0     | 0      | 0.11    | 2.3    | 0     |
| Propionibacterium              | 56 | 43      | 44  | 52  | 0.01  | 0.02   | 0       | 0.02   | 0.27  |
| Peptococcus                    | 57 | 55      | 45  | 54  | 0.01  | 0.01   | 0       | 0.06   | 0.01  |
| Lachnospiraceae_4              | 58 | 63      | 74  | 61  | 0     | 0      | 0       | 0.11   | 0     |
| Coriobacteriaceae_1            | 59 | 67      | 43  | 55  | 0.01  | 0      | 0       | 0.03   | 0.01  |
| Bulleidia                      | 60 | 75      | 71  | 64  | 0     | 0.01   | 0       | 0.04   | 0     |
| Bacteroidales_1                | 61 | 74      | 62  | 59  | 0.01  | 0      | 0       | 0.1    | 0     |
| Sutterella                     | 62 | 77      | 59  | 60  | 0.01  | 0.02   | 0       | 0.02   | 0.01  |
| Proteobacteria_1               | 63 | 58      | 79  | 65  | 0     | 0      | 0.01    | 0.13   | 0     |
| Facklamia                      | 64 | 64      | 51  | 62  | 0.01  | 0.06   | 0       | 0.06   | 0     |
| Clostridiales_15               | 65 | 68      | 50  | 63  | 0     | 0      | 0       | 0.02   | 0     |
| Lactobacillus_1                | 66 | 61      | 75  | 71  | 0.1   | 0.13   | 0.04    | 0.44   | 0     |
| Stenotrophomonas               | 67 | 71      | 65  | 69  | 0.01  | 0.01   | 0       | 0      | 0.01  |
| Lactococcus                    | 68 | 69      | 61  | 66  | 0.01  | 0.01   | 0       | 0.01   | 0.01  |

Figure 3: List of taxa arranged in order of decreasing number of occurrences *NP*. Taxa abundance rank is calculated using average percentage abundance of each taxon across samples. Community state types CST I-V and corresponding taxa average abundance in each CST are taken from Supplementary Table 5 in Ravel et al. [2011]. Taxa highlighted in yellow correspond to CST I, II, III and V taxa. Red colored taxa correspond to the 25 core taxa common to all filtering methods with respect to different taxa orderings. Missing data are coded as NA.

|                | NP  | pvalues | NC  | NCW | CST.I | CST.II | CST.III | CST.IV | CST.V |      |
|----------------|-----|---------|-----|-----|-------|--------|---------|--------|-------|------|
| Enterococcus   | 69  |         | 86  | 67  | 70    | 0      | 0.01    | 0.01   | 0.05  | 0.01 |
| Proteobacter   | 70  |         | 65  | 90  | 72    | 0      | 0       | 0      | 0.09  | 0    |
| Lactobacillus  | 71  |         | 52  | 108 | 75    | 0.02   | 0.01    | 0      | 0.21  | 0    |
| Fastidiosipila | 72  |         | 60  | 54  | 68    | 0      | 0.02    | 0      | 0.01  | 0    |
| Anaerovorax    | 73  |         | 82  | 49  | 67    | 0      | 0.01    | 0      | 0.02  | 0    |
| Lachnospirac   | 74  |         | 90  | 125 | 83    | 0      | 0       | 0      | 0.04  | 0    |
| Clostridium    | 75  |         | 72  | 135 | 86    | 0.04   | 0       | 0      | 0     | 0    |
| Propionimicr   | 76  |         | 70  | 84  | 76    | 0      | 0.04    | 0      | 0.01  | 0    |
| Enterobacter   | 77  |         | 62  | 73  | 74    | 0      | 0.02    | 0.01   | 0.08  | 0    |
| Clostridiales_ | 78  |         | 76  | 98  | 79    | 0      | 0       | 0      | 0.03  | 0    |
| Arthrobacter   | 79  |         | 73  | 63  | 73    | 0      | 0       | 0      | 0.04  | 0.01 |
| Lachnospirac   | 80  |         | 81  | 76  | 78    | 0.01   | 0.01    | 0      | 0.03  | 0    |
| Gallicola      | 81  |         | 85  | 80  | 80    | 0.01   | 0       | 0      | 0.01  | 0    |
| Dorea          | 82  |         | 87  | 66  | 77    | 0.01   | 0.03    | 0      | 0.02  | 0    |
| Brevibacteriu  | 83  |         | 84  | 81  | 81    | 0      | 0       | 0      | 0.06  | 0.02 |
| Dethiosulfovi  | 84  |         | 78  | 82  | 84    | 0      | 0       | 0      | 0.06  | 0.04 |
| Clostridiales_ | 85  |         | 91  | 93  | 88    | 0      | 0       | 0      | 0.01  | 0    |
| Bacteroidete   | 86  |         | 101 | 123 | 93    | 0      | 0       | 0      | 0.02  | 0    |
| Pseudomona     | 87  |         | 121 | 89  | 87    | 0      | 0.01    | 0      | 0.01  | 0    |
| Lachnospirac   | 88  |         | 116 | 68  | 82    | 0      | 0       | 0      | 0.02  | 0    |
| Bacteroidete   | 89  |         | 109 | 70  | 85    | 0      | 0       | 0      | 0.02  | 0    |
| Flavobacteria  | 90  |         | 100 | 127 | 94    | 0      | 0.08    | 0      | 0.01  | 0    |
| Lachnospirac   | 91  |         | 92  | 132 | 106   | 0      | 0       | 0.01   | 0.01  | 0    |
| Actinobaculu   | 92  |         | 88  | 97  | 91    | 0      | 0.03    | 0      | 0.02  | 0    |
| Bacteroidete   | 93  |         | 89  | 94  | 89    | 0      | 0       | 0      | 0.03  | 0    |
| Bacteroidale:  | 94  |         | 102 | 83  | 92    | 0      | 0       | 0      | 0     | 0.02 |
| Serratia       | 95  |         | 124 | 78  | 90    | 0      | 0.01    | 0      | 0     | 0    |
| Acinetobacte   | 96  |         | 127 | 133 | 108   | 0      | 0       | 0      | 0     | 0.01 |
| Acidovorax     | 97  |         | 122 | 106 | 97    | 0.01   | 0       | 0      | 0     | 0    |
| Lactobacillus  | 98  |         | 93  | 137 | 110   | 0.01   | 0.24    | 0      | 0     | 0    |
| Bifidobacteri  | 99  |         | 66  | 111 | 101   | 0      | 0.11    | 0      | 0.15  | 0    |
| Bacteroidete   | 100 |         | 80  | 85  | 95    | 0      | 0       | 0      | 0.01  | 0    |
| Collinsella    | 101 |         | 98  | 91  | 98    | 0      | 0       | 0      | 0     | 0    |
| Clostridiales_ | 102 |         | 135 | 107 | 105   | 0      | 0       | 0      | 0.01  | 0    |
| Coriobacteria  | 103 |         | 140 | 116 | 107   | 0      | 0       | 0      | 0.01  | 0    |
| Roseburia      | 104 |         | 131 | 100 | 102   | 0      | 0.01    | 0      | 0.01  | 0    |
| Ruminococct    | 105 |         | 110 | 88  | 96    | 0.01   | 0.01    | 0      | 0.02  | 0    |
| Lachnospirac   | 106 |         | 120 | 77  | 100   | 0      | 0       | 0      | 0     | 0    |
| TM7_genera     | 107 |         | 134 | 86  | 103   | 0      | 0.01    | 0      | 0     | 0    |
| Subdoligranu   | 108 |         | 161 | 72  | 99    | 0      | 0.01    | 0      | 0.01  | 0.01 |
| Helcococcus    | 109 |         | 145 | 87  | 104   | 0      | 0.03    | 0      | 0.01  | 0    |
| Haemophilus    | 110 |         | 128 | 117 | 111   | 0      | 0.01    | 0      | 0.01  | 0.01 |
| Citrobacter    | 111 |         | 108 | 164 | 127   | 0      | 0       | 0      | 0.03  | 0    |
| Peptostrepto   | 112 |         | 117 | 119 | 117   | 0      | 0.01    | 0      | 0     | 0    |
| Megamonas      | 113 |         | 105 | 110 | 112   | 0.01   | 0.05    | 0      | 0.01  | 0    |
| Enterobacter   | 114 |         | 106 | 114 | 114   | 0      | 0       | 0      | 0.02  | 0    |
| Bacteria_4     | 115 |         | 94  | 96  | 109   | 0.01   | 0       | 0      | 0.02  | 0    |
| Granulicatell  | 116 |         | 96  | 124 | 119   | 0      | 0       | 0      | 0.01  | 0.05 |
| Flavobacteriu  | 117 |         | 119 | 159 | 134   | 0      | 0       | 0      | 0     | 0    |
| Ruminococcae   | 118 |         | 147 | 128 | 125   | 0      | 0       | 0      | 0     | 0    |
| Enterobacter   | 119 |         | 153 | 149 | 131   | 0      | 0       | 0      | 0     | 0    |
| Slackia        | 120 |         | 151 | 104 | 118   | 0      | 0.01    | 0      | 0     | 0    |
| Coprocooccus   | 121 |         | 133 | 121 | 122   | 0      | 0       | 0      | 0     | 0    |
| Bacteroidete   | 122 |         | 142 | 101 | 115   | 0      | 0       | 0      | 0.01  | 0    |
| Clostridiales_ | 123 |         | 143 | 92  | 113   | 0      | 0       | 0      | 0.01  | 0    |
| Coprobacillu:  | 124 |         | 129 | 122 | 123   | 0      | 0.01    | 0      | 0.01  | 0    |
| Parabacteroi   | 125 |         | 123 | 102 | 116   | 0      | 0       | 0      | 0.01  | 0    |
| Rothia         | 126 |         | 103 | 112 | 120   | 0      | 0       | 0      | 0.02  | 0.16 |
| Pasteurella    | 127 |         | 83  | 129 | 126   | 0      | 0       | 0      | 0.41  | 0    |
| Ruminococcae   | 128 |         | 95  | 145 | 135   | 0      | 0       | 0      | 0     | 0    |
| Bacteria_12    | 129 |         | 104 | 131 | 130   | 0      | 0       | 0      | 0     | 0    |
| Bacteria_19    | 130 |         | 164 | 95  | 121   | 0      | 0       | 0      | 0     | 0    |
| Dermabacter    | 131 |         | 160 | 163 | 137   | 0      | 0       | 0      | 0     | 0    |
| Clostridiales_ | 132 |         | 171 | 105 | 124   | 0      | 0       | 0      | 0     | 0    |
| Neisseriaceae  | 133 |         | 148 | 120 | 128   | 0      | 0       | 0      | 0.01  | 0    |
| Erysipelotricl | 134 |         | 126 | 136 | 132   | 0      | 0       | 0      | 0     | 0    |
| Sphingomon:    | 135 |         | 112 | 155 | 136   | 0      | 0       | 0      | 0     | 0.03 |
| Firmicutes_5   | 136 |         | 130 | 138 | 138   | 0      | 0       | 0      | 0     | 0    |
| Enterococcae   | 137 |         | 163 | 173 | 154   | 0      | 0       | 0      | 0     | 0    |

Figure 4: List of taxa (ctd.) arranged in order of decreasing number of occurrences *NP*. Taxa abundance rank is calculated using average percentage abundance of each taxon across samples. Community state types CST I-V and corresponding taxa average abundance in each CST are taken from Supplementary Table 5 in Ravel et al. [2011]. Missing data are coded as NA.

|                | NP  | pvalues | NC  | NCW | CST.I | CST.II | CST.III | CST.IV | CST.V |
|----------------|-----|---------|-----|-----|-------|--------|---------|--------|-------|
| Proteobacter   | 139 |         | 168 | 143 | 140   | 0      | 0       | 0      | 0     |
| Firmicutes_2   | 140 |         | 174 | 167 | 150   | NA     | NA      | NA     | NA    |
| Incertae_sed   | 141 |         | 167 | 156 | 148   | 0      | 0       | 0      | 0     |
| Firmicutes_3   | 142 |         | 184 | 144 | 141   | 0      | 0       | 0      | 0     |
| Janthinobact   | 143 |         | 172 | 186 | 159   | 0      | 0.01    | 0      | 0     |
| Bacteria_17    | 144 |         | 165 | 113 | 133   | 0      | 0.01    | 0      | 0     |
| Betaproteob:   | 145 |         | 157 | 183 | 158   | 0      | 0       | 0      | 0     |
| Ruminococca    | 146 |         | 156 | 99  | 129   | 0      | 0       | 0      | 0.01  |
| Kocuria        | 147 |         | 137 | 150 | 146   | 0      | 0       | 0      | 0.01  |
| Neisseria      | 148 |         | 115 | 147 | 143   | 0      | 0       | 0      | 0.03  |
| Bilophila      | 149 |         | 114 | 126 | 147   | 0      | 0       | 0      | 0     |
| Aquabacteriu   | 150 |         | 144 | 178 | 170   | 0      | 0       | 0      | 0     |
| Chryseobact    | 151 |         | 176 | 185 | 173   | 0      | 0       | 0      | 0     |
| Methylobact    | 152 |         | 194 | 191 | 175   | 0      | 0       | 0      | 0     |
| Firmicutes_4   | 153 |         | 185 | 222 | 189   | 0      | 0       | 0      | 0     |
| Enhydrobact    | 154 |         | 191 | 151 | 155   | 0      | 0       | 0      | 0     |
| Flexibacterac  | 155 |         | 197 | 201 | 178   | 0      | 0       | 0      | 0     |
| Dermabacter    | 156 |         | 201 | 161 | 162   | 0      | 0       | 0      | 0     |
| Bacteroidete   | 157 |         | 187 | 152 | 156   | 0      | 0       | 0      | 0     |
| Lachnospirac   | 158 |         | 180 | 158 | 160   | 0      | 0       | 0      | 0     |
| Bacteroidete   | 159 |         | 188 | 118 | 144   | 0      | 0       | 0      | 0     |
| Proteobacter   | 160 |         | 166 | 168 | 164   | 0      | 0       | 0      | 0.01  |
| Bacteria_6     | 161 |         | 154 | 180 | 171   | 0      | 0       | 0      | 0     |
| Proteobacter   | 162 |         | 125 | 169 | 165   | 0      | 0       | 0      | 0     |
| GpIX           | 163 |         | 138 | 229 | 196   | 0      | 0       | 0      | 0     |
| Salmonella     | 164 |         | 139 | 214 | 185   | 0      | 0       | 0      | 0     |
| Succinispira   | 165 |         | 149 | 141 | 152   | 0      | 0       | 0      | 0     |
| Bacteria_15    | 166 |         | 162 | 142 | 153   | 0      | 0       | 0      | 0     |
| Clostridiales_ | 167 |         | 179 | 109 | 139   | 0      | 0       | 0      | 0     |
| Bacteria_5     | 168 |         | 186 | 115 | 142   | 0      | 0       | 0      | 0     |
| Clostridiales_ | 169 |         | 173 | 130 | 149   | 0      | 0       | 0      | 0     |
| Micrococcus    | 170 |         | 175 | 172 | 166   | 0      | 0       | 0      | 0     |
| Bacteria_22    | 171 |         | 158 | 175 | 167   | 0      | 0       | 0      | 0.01  |
| Gpl            | 172 |         | 141 | 204 | 180   | 0.01   | 0       | 0      | 0     |
| Atopobacter    | 173 |         | 111 | 165 | 163   | 0      | 0       | 0      | 0.01  |
| Burkholderia   | 174 |         | 113 | 139 | 151   | 0      | 0       | 0      | 0.01  |
| Enterobacter   | 175 |         | 107 | 176 | 168   | 0      | 0       | 0      | 0.02  |
| Alistipes      | 176 |         | 97  | 160 | 161   | 0      | 0       | 0      | 0.03  |
| Klebsiella     | 177 |         | 79  | 153 | 157   | 0      | 0       | 0      | 0.31  |
| Patulibacter   | 178 |         | 99  | 198 | 197   | 0      | 0       | 0      | 0     |
| Roseomonas     | 179 |         | 132 | 219 | 208   | 0      | 0       | 0      | 0     |
| Bacillales_5   | 180 |         | 198 | 216 | 207   | 0      | 0       | 0      | 0     |
| Microbacteri   | 181 |         | 199 | 235 | 218   | 0      | 0       | 0      | 0     |
| Flexibacterac  | 182 |         | 190 | 213 | 206   | 0      | 0       | 0      | 0     |
| Novosphingo    | 183 |         | 189 | 228 | 210   | 0      | 0       | 0      | 0     |
| Pseudomona     | 184 |         | 204 | 194 | 193   | 0      | 0       | 0      | 0     |
| Riemerella     | 185 |         | 217 | 189 | 191   | 0      | 0       | 0      | 0     |
| Corynebacte    | 186 |         | 219 | 179 | 186   | 0      | 0       | 0      | 0     |
| Janibacter     | 187 |         | 215 | 187 | 190   | 0      | 0       | 0      | 0     |
| Methylovoru    | 188 |         | 213 | 220 | 209   | 0      | 0       | 0      | 0     |
| Proteobacter   | 189 |         | 211 | 181 | 187   | 0      | 0       | 0      | 0     |
| Rhizobium      | 190 |         | 206 | 190 | 192   | 0      | 0       | 0      | 0     |
| Clostridiales_ | 191 |         | 210 | 206 | 201   | 0      | 0       | 0      | 0     |
| Clostridiales_ | 192 |         | 221 | 140 | 172   | 0      | 0       | 0      | 0     |
| OD1_genera_    | 193 |         | 233 | 146 | 174   | 0      | 0       | 0      | 0     |
| Clostridiales_ | 194 |         | 230 | 134 | 169   | 0      | 0       | 0      | 0     |
| Actinobacillu  | 195 |         | 228 | 203 | 200   | 0      | 0       | 0      | 0     |
| Ruminococca    | 196 |         | 220 | 166 | 181   | 0      | 0       | 0      | 0     |
| Flexibacterac  | 197 |         | 223 | 195 | 194   | 0      | 0       | 0      | 0     |
| Bacteroidete   | 198 |         | 200 | 170 | 182   | 0      | 0       | 0      | 0     |
| Bacteria_11    | 199 |         | 183 | 177 | 184   | 0      | 0       | 0      | 0     |
| Jeotgalicoccl  | 200 |         | 177 | 157 | 177   | 0      | 0       | 0      | 0     |
| Bacteria_8     | 201 |         | 178 | 211 | 204   | 0      | 0       | 0      | 0     |
| Clostridia_2   | 202 |         | 203 | 200 | 198   | 0      | 0       | 0      | 0     |
| Veillonellace  | 203 |         | 207 | 182 | 188   | 0      | 0       | 0      | 0     |
| Crenotrichac   | 204 |         | 214 | 207 | 202   | 0      | 0       | 0      | 0     |
| SR1_genera_    | 205 |         | 216 | 162 | 179   | 0      | 0       | 0      | 0     |
| Catenibacter   | 206 |         | 195 | 212 | 205   | 0      | 0       | 0      | 0     |

Figure 5: List of taxa (ctd.) arranged in order of decreasing number of occurrences *NP*. Taxa abundance rank is calculated using average percentage abundance of each taxon across samples. Community state types CST I-V and corresponding taxa average abundance in each CST are taken from Supplementary Table 5 in Ravel et al. [2011]. Missing data are coded as NA.

|                | NP  | pvalues | NC  | NCW | CST.I | CST.II | CST.III | CST.IV | CST.V |
|----------------|-----|---------|-----|-----|-------|--------|---------|--------|-------|
| Luteococcus    | 207 | 202     | 154 | 176 | 0     | 0      | 0       | 0      | 0     |
| Duganella      | 208 | 196     | 202 | 199 | 0     | 0      | 0       | 0      | 0     |
| Fusobacteria   | 209 | 218     | 171 | 183 | 0     | 0      | 0       | 0      | 0     |
| Bacillus_j     | 210 | 192     | 208 | 203 | 0.01  | 0      | 0       | 0      | 0     |
| Scardovia      | 211 | 152     | 197 | 195 | 0     | 0      | 0       | 0      | 0.14  |
| Microbacteri   | 212 | 136     | 246 | 246 | 0     | 0      | 0       | 0      | 0     |
| Bacilli_2      | 213 | 169     | 241 | 241 | 0     | 0      | 0       | 0      | 0     |
| Simplicispira  | 214 | 212     | 236 | 236 | 0     | 0      | 0       | 0      | 0     |
| Proteobacter   | 215 | 225     | 193 | 215 | 0     | 0      | 0       | 0      | 0     |
| Clostridiales_ | 216 | 235     | 227 | 230 | 0     | 0      | 0       | 0      | 0     |
| Bacillus_c     | 217 | 245     | 224 | 227 | 0     | 0      | 0       | 0      | 0     |
| Dermacoccus    | 218 | 246     | 215 | 222 | 0     | 0      | 0       | 0      | 0     |
| Flectobacillu  | 219 | 239     | 239 | 239 | 0     | 0      | 0       | 0      | 0     |
| Gordonia       | 220 | 237     | 233 | 234 | 0     | 0      | 0       | 0      | 0     |
| Polaromonas    | 221 | 238     | 184 | 212 | 0     | 0      | 0       | 0      | 0     |
| Selenomonas    | 222 | 241     | 209 | 220 | 0     | 0      | 0       | 0      | 0     |
| Clostridiales_ | 223 | 244     | 217 | 223 | 0     | 0      | 0       | 0      | 0     |
| Gp8            | 224 | 242     | 245 | 245 | 0     | 0      | 0       | 0      | 0     |
| Turicella      | 225 | 243     | 234 | 235 | 0     | 0      | 0       | 0      | 0     |
| Rhodoferax     | 226 | 229     | 244 | 244 | 0     | 0      | 0       | 0      | 0     |
| Ruminococce    | 227 | 234     | 221 | 225 | 0     | 0      | 0       | 0      | 0     |
| Flexibacterac  | 228 | 224     | 242 | 242 | 0     | 0      | 0       | 0      | 0     |
| Bradyrhizobii  | 229 | 236     | 205 | 219 | 0     | 0      | 0       | 0      | 0     |
| Leptotrichia   | 230 | 227     | 231 | 232 | 0     | 0      | 0       | 0      | 0     |
| Firmicutes_1   | 231 | 231     | 210 | 221 | 0     | 0      | 0       | 0      | 0     |
| Incertae_sed   | 232 | 232     | 199 | 217 | 0     | 0      | 0       | 0      | 0     |
| Proteobacter   | 233 | 209     | 232 | 233 | 0     | 0      | 0       | 0      | 0     |
| Zimmermanr     | 234 | 193     | 223 | 226 | 0     | 0      | 0       | 0      | 0     |
| Rhodococcus    | 235 | 170     | 230 | 231 | 0     | 0      | 0       | 0      | 0     |
| Proteobacter   | 236 | 208     | 196 | 216 | 0     | 0      | 0       | 0      | 0     |
| Conchiformit   | 237 | 226     | 218 | 224 | 0     | 0      | 0       | 0      | 0     |
| Acidaminoco    | 238 | 240     | 174 | 211 | 0     | 0      | 0       | 0      | 0     |
| Pantoea        | 239 | 222     | 237 | 237 | 0     | 0.01   | 0       | 0      | 0     |
| Enterobacter   | 240 | 205     | 225 | 228 | 0     | 0      | 0       | 0      | 0     |
| Bacteria_23    | 241 | 182     | 192 | 214 | 0     | 0      | 0       | 0      | 0     |
| Flexibacterac  | 242 | 159     | 247 | 247 | 0     | 0      | 0       | 0      | 0     |
| Paenibacillus  | 243 | 146     | 238 | 238 | 0     | 0.01   | 0       | 0      | 0     |
| Capnocytoph    | 244 | 150     | 188 | 213 | 0     | 0      | 0       | 0.01   | 0     |
| Skermanella    | 245 | 155     | 243 | 243 | 0     | 0      | 0       | 0      | 0.03  |
| Oerskovia      | 246 | 118     | 240 | 240 | 0.03  | 0      | 0       | 0      | 0     |
| Enterobacter   | 247 | 247     | 226 | 229 | 0     | 0      | 0       | 0.03   | 0     |

Figure 6: List of taxa (ctd.) arranged in order of decreasing number of occurrences *NP*. Taxa abundance rank is calculated using average percentage abundance of each taxon across samples. Community state types CST I-V and corresponding taxa average abundance in each CST are taken from Supplementary Table 5 in Ravel et al. [2011]. Missing data are coded as NA.

## References

- J. P. Brooks, D. J. Edwards, M. D. Harwich, M. C. Rivera, J. M. Fettweis, M. G. Serrano, R. A. Reris, N. U. Sheth, B. Huang, P. Girerd, a. m. Vaginal Microbiome Consortium, J. F. Strauss, K. K. Jefferson, and G. A. Buck. The truth about metagenomics: quantifying and counteracting bias in 16S rRNA studies. *BMC Microbiology*, 15(66):1–14, 2015.
- J. M. Fettweis, M. G. Serrano, N. U. Sheth, C. M. Mayer, A. L. Glascock, J. P. Brooks, K. K. Jefferson, a. m. Vaginal Microbiome Consortium, and G. A. Buck. Species-level classification of the vaginal microbiome. *BMC Genomics*, 13(Suppl 8):1–9, 2012.
- J. Ravel, P. Gajer, Z. Abdo, G. M. Schneider, S. S. K. Koenig, S. L. McCulle, S. Karlebach, R. Gorle, J. Russell, C. O. Tacket, R. M. Brotman, C. C. Davis, K. Ault, L. Peralta, and L. J. Forney. Vaginal microbiome of reproductive-age women. *Proceedings of the National Academy of Sciences*, 108(Supplement 1):4680–4687, 2011.
